# Supplementary material for: A stochastic approach for assessing the chronic environmental risk generated by wet-weather events from integrated urban wastewater systems
Source: Royal Society of Chemistry journal article supplement (doi:10.1039/d3ew00143a), 2023-01-01
Supplement: d3ew00143a1.pdf [file d3ew00143a1.pdf]

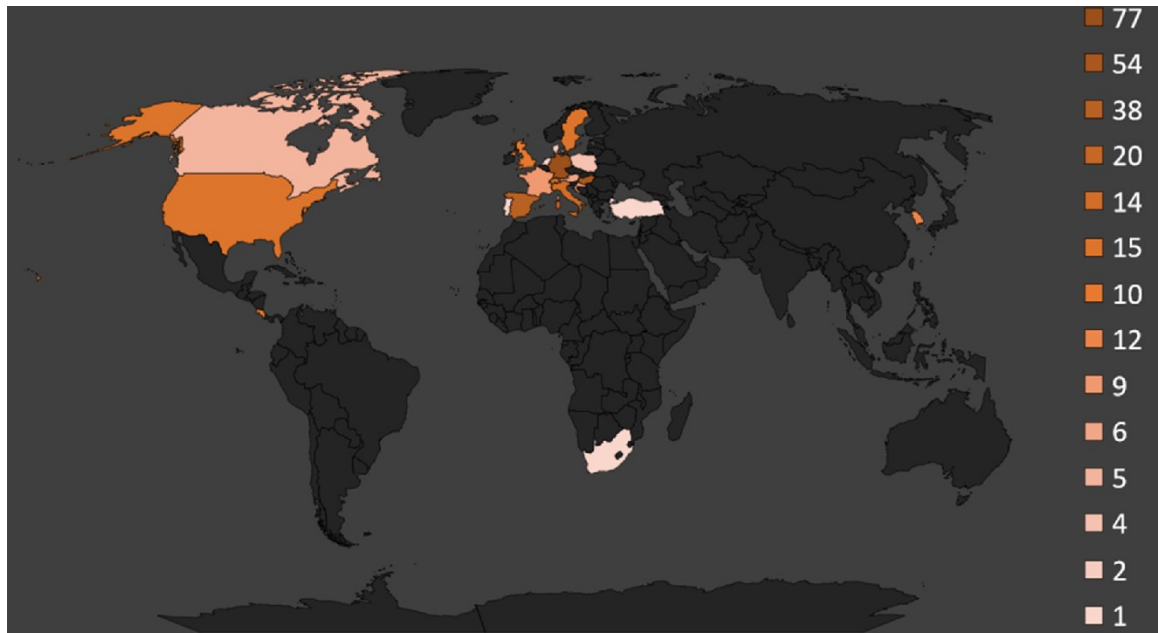

**Figure S1.** Number of IUWSs included in this study per each country of the world.

**Table S1.** Number of sewer systems with only concentration data (C), volumes data (V), and their combination (C and V) per each discharge and surface water recipient.

|                                | <i>CSO</i> |          |                | <i>BP</i> |          |                | <i>EFF</i> |          |                | <i>Q<sub>R</sub></i> |          |                |
|--------------------------------|------------|----------|----------------|-----------|----------|----------------|------------|----------|----------------|----------------------|----------|----------------|
|                                | <i>C</i>   | <i>V</i> | <i>C&amp;V</i> | <i>C</i>  | <i>V</i> | <i>C&amp;V</i> | <i>C</i>   | <i>V</i> | <i>C&amp;V</i> | <i>C</i>             | <i>V</i> | <i>C&amp;V</i> |
| <i>Number of sewer systems</i> | 27         | 9        | 16             | 7         | 6        | 16             | 15         | 115      | 102            | 52                   | 13       |                |
| <i>TOT</i>                     |            | 52       |                |           | 29       |                |            | 232      |                | 65                   |          |                |

**Table S2.** For V, Q<sub>R</sub>, and C of each discharge, ranges of values, number of references used, and specific references are reported. “Values range” represents the minimum and maximum values registered for V and Q<sub>R</sub> across all articles, while for concentrations the interval is reported as the average values of the 25<sup>th</sup> percentiles and 75<sup>th</sup> percentiles of the detected concentrations.

| <i>Variable</i>        | <i>Discharge type</i> | <i>Values range</i>                       | <i>Unit</i>       | <i>N° references</i> | <i>References</i>                                          |
|------------------------|-----------------------|-------------------------------------------|-------------------|----------------------|------------------------------------------------------------|
| <i>V</i>               | <i>CSO</i>            | 9.5·10 <sup>3</sup> – 9.3·10 <sup>6</sup> | m <sup>3</sup> /y | 13                   | 1–13                                                       |
|                        | <i>BP</i>             | 6.0·10 <sup>3</sup> – 9.0·10 <sup>6</sup> | m <sup>3</sup> /y | 14                   | 1, 5, 6, 14–24                                             |
|                        | <i>EFF</i>            | 1.8·10 <sup>3</sup> – 3.5·10 <sup>9</sup> | m <sup>3</sup> /y | 35                   | 1, 10, 21, 25–56                                           |
| <i>Q<sub>R</sub></i>   | <i>RIVER</i>          | 0.01 – 7993                               | m <sup>3</sup> /s | 21                   | 7, 9, 39, 41, 43, 45, 46, 49, 52, 56–58, 22, 59, 28, 33–38 |
| <i>E. Coli</i>         | <i>CSO</i>            | 1.0 10 <sup>6</sup> -2.0 10 <sup>6</sup>  | CFU/100 mL        | 3                    | 6, 60, 61                                                  |
|                        | <i>BP</i>             | 1.2 10 <sup>6</sup> -3.1 10 <sup>6</sup>  | CFU/100 mL        | 4                    | 6, 17, 18, 62                                              |
|                        | <i>EFF</i>            | 1-7.4                                     | CFU/100 mL        | 2                    | 25, 26                                                     |
| <i>TSS</i>             | <i>CSO</i>            | 87.5-195.3                                | mg/L              | 11                   | 1, 2, 8, 9, 51, 60, 61, 63–66                              |
|                        | <i>BP</i>             | 76.8-148.5                                | mg/L              | 8                    | 1, 18, 19, 22, 23, 51, 62, 67                              |
|                        | <i>EFF</i>            | 2.8-6.5                                   | mg/L              | 4                    | 25, 26, 30, 51                                             |
| <i>BOD<sub>5</sub></i> | <i>CSO</i>            | 55.0-117.4                                | mg/L              | 6                    | 8, 51, 61, 63, 64, 66                                      |
|                        | <i>BP</i>             | 144.3-220.5                               | mg/L              | 4                    | 22, 23, 51, 67                                             |
|                        | <i>EFF</i>            | 5.0-6.0                                   | mg/L              | 4                    | 25, 28, 30, 51                                             |
| <i>COD</i>             | <i>CSO</i>            | 72.5-154.9                                | mg/L              | 9                    | 1, 8, 9, 51, 61, 63–66                                     |

| <i>Variable</i>       | <b>Discharge type</b> | <b>Values range</b> | <b>Unit</b> | <b>N° references</b> | <b>References</b>                             |
|-----------------------|-----------------------|---------------------|-------------|----------------------|-----------------------------------------------|
|                       | <b>BP</b>             | 195.6-220.1         | mg/L        | <b>6</b>             | 1, 18, 19, 22, 23, 51                         |
|                       | <b>EFF</b>            | 19.0-39.4           | mg/L        | <b>6</b>             | 1, 25, 26, 28, 30, 51                         |
| <i>NH<sub>4</sub></i> | <b>CSO</b>            | 4.0-5.5             | mg/L        | <b>5</b>             | 1, 8, 61, 64, 66                              |
|                       | <b>BP</b>             | 5.5-10.9            | mg/L        | <b>4</b>             | 1, 19, 22, 62                                 |
|                       | <b>EFF</b>            | 0.1-0.8             | mg/L        | <b>3</b>             | 1, 25, 30                                     |
| <i>NO<sub>3</sub></i> | <b>CSO</b>            | 0.0-0.2             | mg/L        | <b>3</b>             | 1, 61, 64                                     |
|                       | <b>BP</b>             | 0.1-0.2             | mg/L        | <b>2</b>             | 1, 19                                         |
|                       | <b>EFF</b>            | 2.8-7.0             | mg/L        | <b>2</b>             | 1, 30                                         |
| <i>TP</i>             | <b>CSO</b>            | 0.7-1.3             | mg/L        | <b>5</b>             | 1, 8, 51, 64, 66                              |
|                       | <b>BP</b>             | 1.0-1.9             | mg/L        | <b>4</b>             | 1, 22, 51, 62                                 |
|                       | <b>EFF</b>            | 0.4-13.4            | mg/L        | <b>4</b>             | 1, 25, 30, 51                                 |
| <i>Cd</i>             | <b>CSO</b>            | 0.1-0.1             | µg/L        | <b>3</b>             | 1, 64, 68                                     |
|                       | <b>BP</b>             | 0.1-0.1             | µg/L        | <b>1</b>             | 1                                             |
|                       | <b>EFF</b>            | 0.0-0.0             | µg/L        | <b>1</b>             | 1                                             |
| <i>Ni</i>             | <b>CSO</b>            | 1.7-4.3             | µg/L        | <b>3</b>             | 1, 64, 68                                     |
|                       | <b>BP</b>             | 2.3-2.8             | µg/L        | <b>1</b>             | 1                                             |
|                       | <b>EFF</b>            | 4.0-6.2             | µg/L        | <b>1</b>             | 1                                             |
| <i>Pb</i>             | <b>CSO</b>            | 2.5-8.8             | µg/L        | <b>5</b>             | 1, 63, 64, 66, 68                             |
|                       | <b>BP</b>             | 2.5-3.4             | µg/L        | <b>3</b>             | 1, 19, 22                                     |
|                       | <b>EFF</b>            | 0.1-0.2             | µg/L        | <b>1</b>             | 1                                             |
| <i>CBZ</i>            | <b>CSO</b>            | 47.2-102.5          | ng/L        | <b>2</b>             | 1, 69                                         |
|                       | <b>BP</b>             | 113.5-151.7         | ng/L        | <b>5</b>             | 1, 17, 18, 20, 51                             |
|                       | <b>EFF</b>            | 240.0-300.0         | ng/L        | <b>12</b>            | 27, 28, 56, 70, 29, 31, 32, 47, 51-53, 55     |
| <i>DCF</i>            | <b>CSO</b>            | 115.4-289.6         | ng/L        | <b>3</b>             | 1, 45, 69                                     |
|                       | <b>BP</b>             | 186.4-322.7         | ng/L        | <b>5</b>             | 1, 17, 18, 20, 51                             |
|                       | <b>EFF</b>            | 590.7-625.0         | ng/L        | <b>14</b>            | 27, 28, 53, 55, 56, 70, 29-32, 45, 47, 51, 52 |
| <i>TCS</i>            | <b>CSO</b>            | 5.2-32.8            | ng/L        | <b>1</b>             | 1                                             |
|                       | <b>BP</b>             | 30.0-42.9           | ng/L        | <b>4</b>             | 1, 20, 21, 51                                 |
|                       | <b>EFF</b>            | 48.1-62.9           | ng/L        | <b>4</b>             | 21, 51-53                                     |
| <i>CBD</i>            | <b>CSO</b>            | 46.0-72.0           | ng/L        | <b>2</b>             | 1, 69                                         |
|                       | <b>BP</b>             | 15.7-26.4           | ng/L        | <b>2</b>             | 1, 20                                         |
|                       | <b>EFF</b>            | 17.8-41.9           | ng/L        | <b>2</b>             | 1, 71                                         |
| <i>DRN</i>            | <b>CSO</b>            | 54.8-137.2          | ng/L        | <b>6</b>             | 1, 8, 10, 66, 68, 69                          |
|                       | <b>BP</b>             | 10.7-20.0           | ng/L        | <b>2</b>             | 1, 20                                         |
|                       | <b>EFF</b>            | 11.8-28.5           | ng/L        | <b>5</b>             | 1, 10, 27, 56, 71                             |
| <i>TRB</i>            | <b>CSO</b>            | 39.8-64.8           | ng/L        | <b>3</b>             | 1, 10, 69                                     |
|                       | <b>BP</b>             | 22.6-34.0           | ng/L        | <b>2</b>             | 1, 20                                         |
|                       | <b>EFF</b>            | 13.4-15.0           | ng/L        | <b>3</b>             | 10, 27, 71                                    |
| <i>BaP</i>            | <b>CSO</b>            | 14.4-49.6           | ng/L        | <b>5</b>             | 1, 8, 64, 66, 68                              |
|                       | <b>BP</b>             | 14.7-26.3           | ng/L        | <b>2</b>             | 1, 20                                         |
|                       | <b>EFF</b>            | 0.2-0.5             | ng/L        | <b>1</b>             | 1                                             |
| <i>CHR</i>            | <b>CSO</b>            | 29.3-74.0           | ng/L        | <b>4</b>             | 1, 64, 66, 68                                 |
|                       | <b>BP</b>             | 26.3-51.6           | ng/L        | <b>2</b>             | 1, 20                                         |
|                       | <b>EFF</b>            | 0.5-0.7             | ng/L        | <b>1</b>             | 1                                             |
| <i>FLU</i>            | <b>CSO</b>            | 42.9-110.8          | ng/L        | <b>5</b>             | 1, 8, 64, 66, 68                              |
|                       | <b>BP</b>             | 57.4-79.1           | ng/L        | <b>3</b>             | 1, 20, 50                                     |
|                       | <b>EFF</b>            | 1.2-2.7             | ng/L        | <b>2</b>             | 1, 50                                         |

30 **Table S3.** Contaminants for which the chronic risk assessment was performed. The toxic level chosen was  
 31 the lowest value between AA-EQS and lowest PNEC<sub>chronic</sub>.

| <i>Micropollutant</i> | <i>Abbreviation</i> | <i>Class</i>        | <i>Abbreviation</i> | <i>Toxic Level</i> | <i>Unit</i> | <i>AA-EQS or PNEC<sub>chronic</sub>?</i> |
|-----------------------|---------------------|---------------------|---------------------|--------------------|-------------|------------------------------------------|
| <i>Cadmium</i>        | Cd                  |                     |                     | 0.08               | µg/L        | AA-EQS                                   |
| <i>Lead</i>           | Pb                  | Metals              | HM                  | 1.2                | µg/L        | AA-EQS                                   |
| <i>Nickel</i>         | Ni                  |                     |                     | 4                  | µg/L        | AA-EQS                                   |
| <i>Carbamazepine</i>  | CBZ                 |                     |                     | 50                 | ng/L        | PNEC <sub>chronic</sub>                  |
| <i>Diclofenac</i>     | DCF                 | Pharmaceuticals     | PHARM               | 50                 | ng/L        | PNEC <sub>chronic</sub>                  |
| <i>Triclosan</i>      | TCS                 |                     |                     | 20                 | ng/L        | PNEC <sub>chronic</sub>                  |
| <i>Carbendazim</i>    | CBD                 |                     |                     | 150                | ng/L        | PNEC <sub>chronic</sub>                  |
| <i>Diuron</i>         | DRN                 | Pesticides          | PEST                | 70                 | ng/L        | PNEC <sub>chronic</sub>                  |
| <i>Terbutryn</i>      | TRB                 |                     |                     | 65                 | ng/L        | AA-EQS                                   |
| <i>Benzo(a)pyrene</i> | BaP                 | Polycyclic Aromatic |                     | 0.17               | ng/L        | AA-EQS                                   |
| <i>Chrysene</i>       | CHR                 | Hydrocarbons        | PAH                 | 2.9                | ng/L        | AA-EQS                                   |
| <i>Fluoranthene</i>   | FLU                 |                     |                     | 6.3                | ng/L        | AA-EQS                                   |

AA-EQS from <sup>72</sup>, PNEC<sub>chronic</sub> from NORMAN database..

32

33 **Table S4.** Statistical distributions of volumes and river flow. The parameters of each distribution and AD  
 34 values resulting from Anderson-Darling goodness of fit test are reported.

| <i>VARIABLE</i>        | <b>BEST FITTING DISTRIBUTION: Lognormal</b> |          |          |                             |  |
|------------------------|---------------------------------------------|----------|----------|-----------------------------|--|
|                        | <b>Distribution parameters</b>              |          |          | <b>Goodness of fit test</b> |  |
|                        | <b>a</b>                                    | <b>b</b> | <b>c</b> | <b>AD value</b>             |  |
| <i>V<sub>CSO</sub></i> | 11.23                                       | 2.40     | 9367.54  | 0.922                       |  |
| <i>V<sub>BP</sub></i>  | 11.36                                       | 2.15     | 5621.79  | 0.307                       |  |
| <i>V<sub>EFF</sub></i> | 14.48                                       | 2.72     | -        | 0.271                       |  |
| <i>Q<sub>R</sub></i>   | 0.04                                        | 3.21     | -        | 1.080                       |  |

35

36 **Table S5.** Percentiles of V<sub>i</sub> and Q<sub>R</sub> used for the definition of each DF scenario. V<sub>i</sub> refers to single discharge  
 37 structure, while resulting DF considers the number of structures used: 1 for BP and EFF, a random number  
 38 between 2 and 20 for CSO.

| <i>SCENARIO</i> | <i>V<sub>i</sub></i>   |            | <i>Q<sub>R</sub></i>   |            | <i>DF</i>  |           |            |
|-----------------|------------------------|------------|------------------------|------------|------------|-----------|------------|
|                 | <i>m<sup>3</sup>/y</i> |            | <i>m<sup>3</sup>/s</i> |            | <i>-</i>   |           |            |
|                 | <b>Discharge</b>       | <b>15P</b> | <b>35P</b>             | <b>65P</b> | <b>85P</b> | <b>5P</b> | <b>95P</b> |
| <i>Safe</i>     | CSO (N=25)             | 1.57E+04   | 3.94E+04               |            |            | 437.42    | 8512.34    |
|                 | BP (N=22)              | 1.49E+04   | 4.30E+04               | 3.57       | 28.91      | 5114.46   | 41021.32   |
|                 | EFF (N=217)            | 1.16E+05   | 6.81E+05               |            |            | 357.46    | 4092.48    |
| <i>Medium</i>   | <b>Discharge</b>       | <b>40P</b> | <b>60P</b>             | <b>40P</b> | <b>60P</b> | <b>5P</b> | <b>95P</b> |
|                 | CSO (N=25)             | 5.05E+04   | 1.47E+05               |            |            | 12.60     | 202.47     |
|                 | BP (N=22)              | 5.53E+04   | 1.53E+05               | 0.46       | 2.34       | 158.06    | 909.10     |
| EFF (N=217)     | 9.76E+05               | 3.87E+06   |                        |            | 6.61       | 46.14     |            |
| <i>Worst</i>    | <b>Discharge</b>       | <b>65P</b> | <b>85P</b>             | <b>15P</b> | <b>35P</b> | <b>5P</b> | <b>95P</b> |
|                 | CSO (N=25)             | 1.99E+05   | 9.06E+05               |            |            | 0.22      | 5.10       |
|                 | BP (N=22)              | 2.01E+05   | 7.96E+05               | 0.04       | 0.30       | 3.13      | 28.4       |
| EFF (N=217)     | 5.54E+06               | 3.26E+07   |                        |            | 0.08       | 0.90      |            |

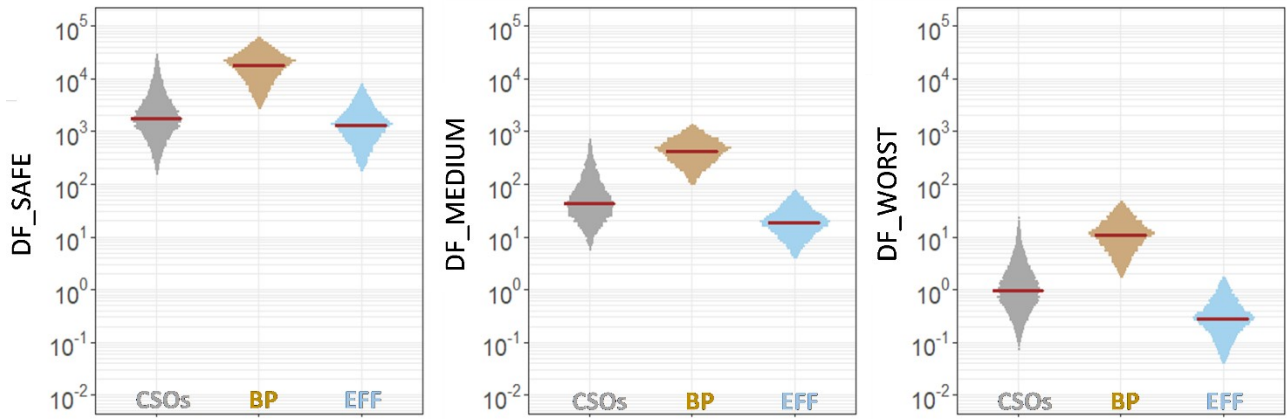

Figure S2. DF values for each DF scenario and each discharge type.

39  
40

41

42

Table S6. Pollution levels of river water expressed by Macro-descriptors Pollution Level (LIM)

| MACRO-<br>DESCRIPTORS             | QUALITY LEVEL    |                |                   |               |               |
|-----------------------------------|------------------|----------------|-------------------|---------------|---------------|
|                                   | 1                | 2              | 3                 | 4             | 5             |
| <i>100-DO (%)</i>                 | < 10             | < 20           | < 30              | < 50          | > 50          |
| <i>N-NO<sub>3</sub></i>           | <0.3             | <1.5           | <5                | <10           | >10           |
| <i>N-NH<sub>4</sub></i>           | <0.03            | <0.1           | <0.5              | <1.5          | >1.5          |
| <i>Total P</i>                    | <0.07            | <0.15          | <0.3              | <0.6          | >0.6          |
| <i>BOD<sub>5</sub></i>            | <2.5             | <4             | <8                | <15           | >15           |
| <i>COD</i>                        | <5               | <10            | <15               | <25           | >25           |
| <i>E. Coli</i>                    | <100             | <1000          | <5000             | <20,000       | >20,000       |
| <i>Single score</i>               | <b>80</b>        | <b>40</b>      | <b>20</b>         | <b>10</b>     | <b>5</b>      |
| <i>LIM - Total score</i>          | <b>480-560</b>   | <b>240-475</b> | <b>120-235</b>    | <b>60-115</b> | <b>&lt;60</b> |
| <i>LIM - Score interpretation</i> | <b>Excellent</b> | <b>Good</b>    | <b>Sufficient</b> | <b>Scarce</b> | <b>Bad</b>    |

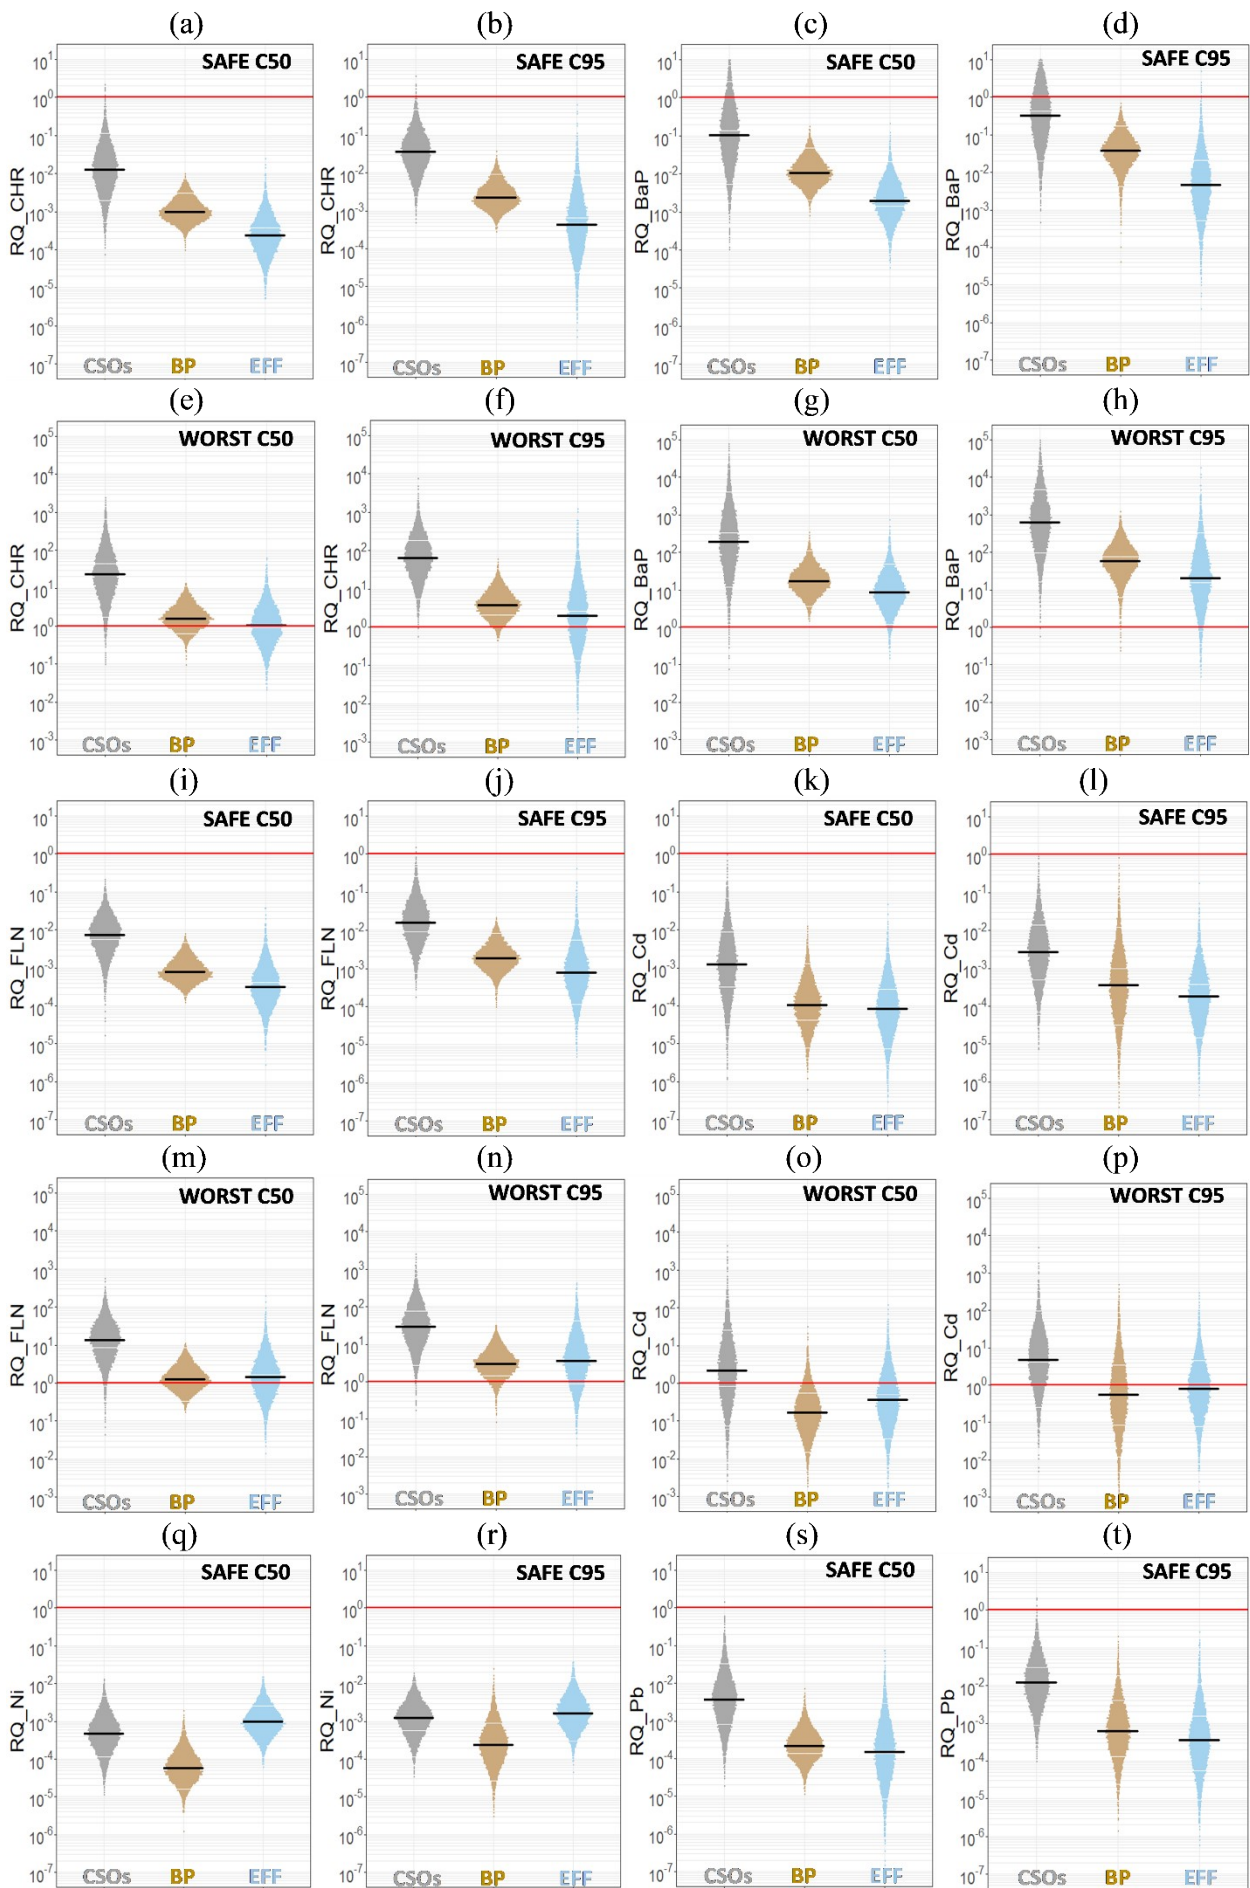

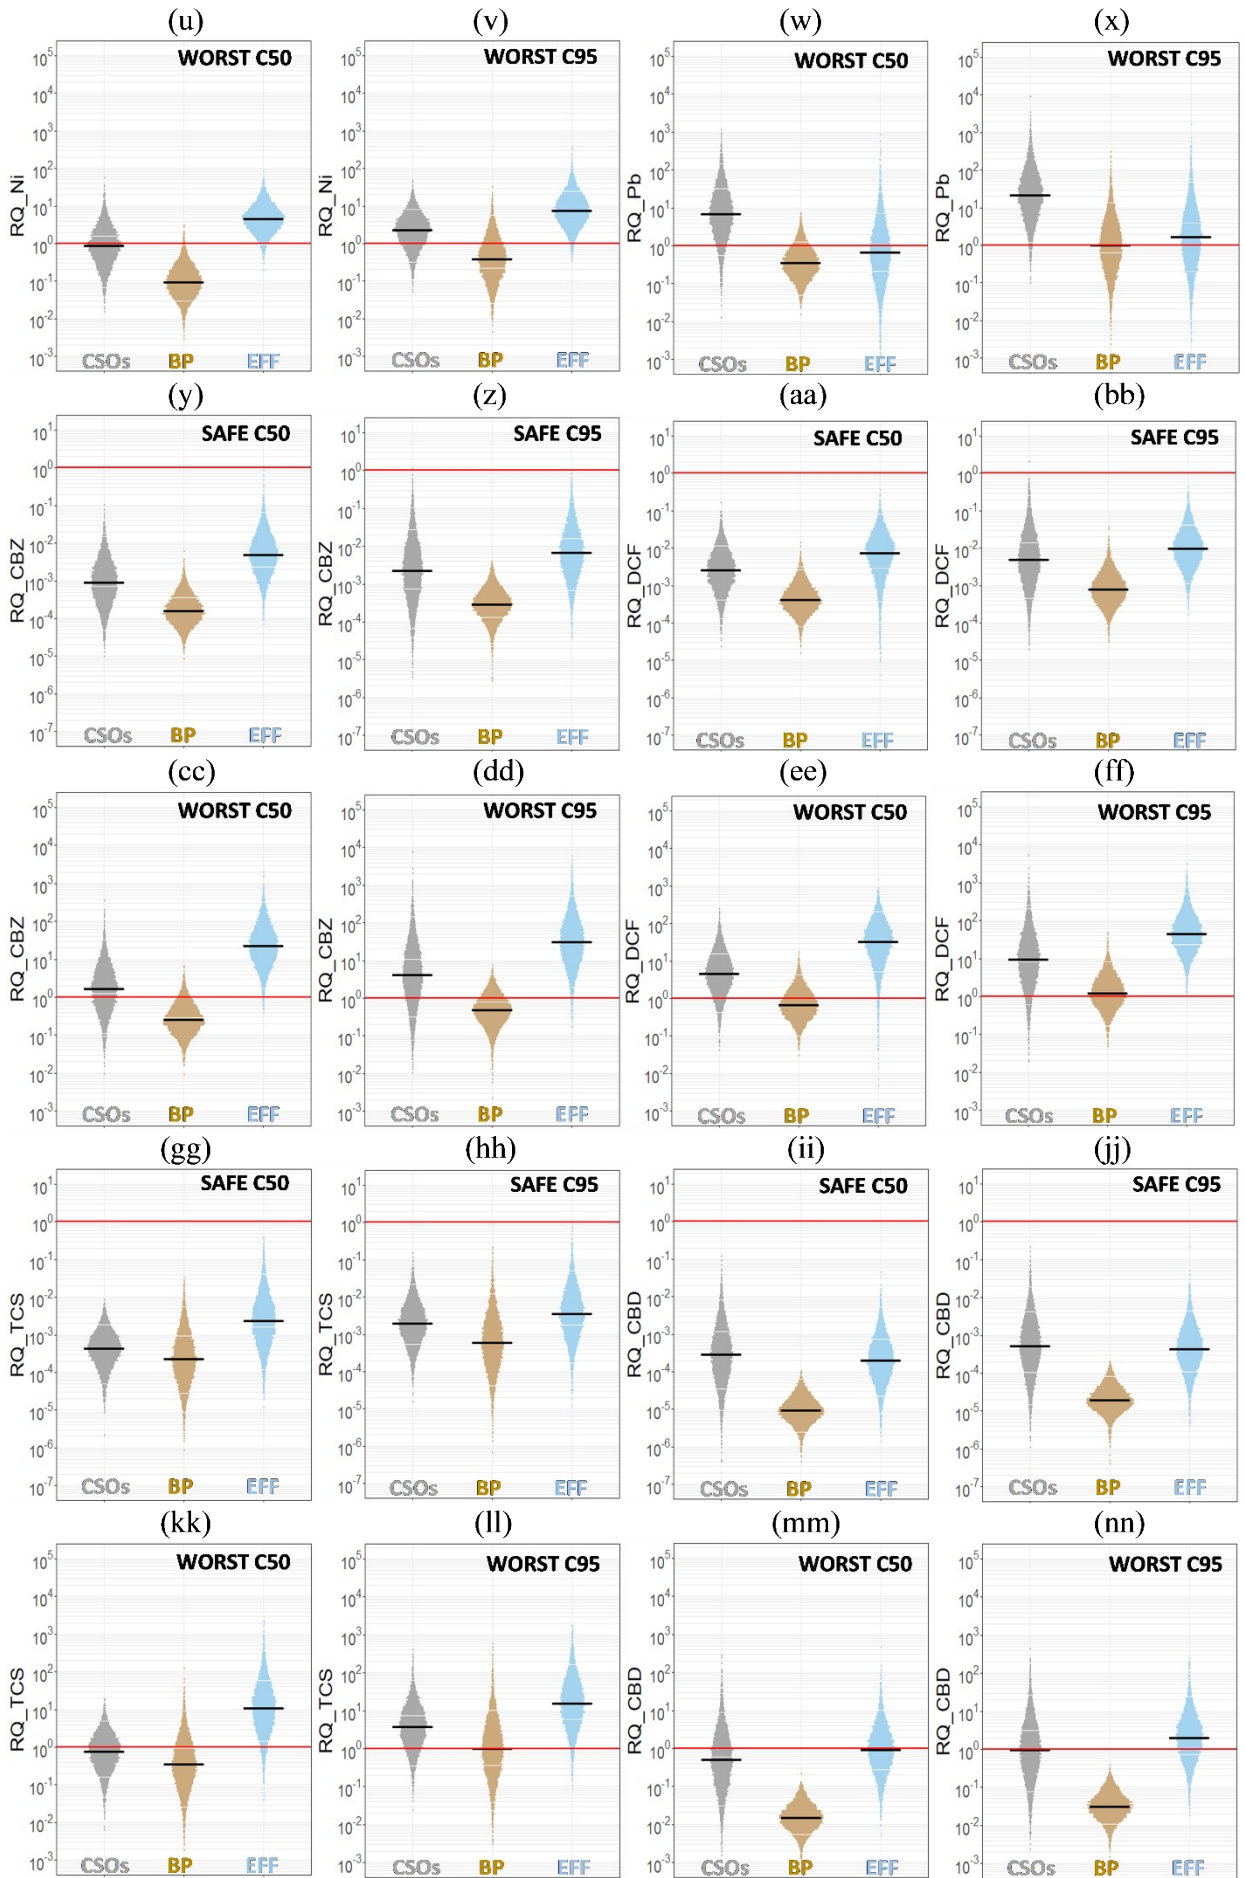

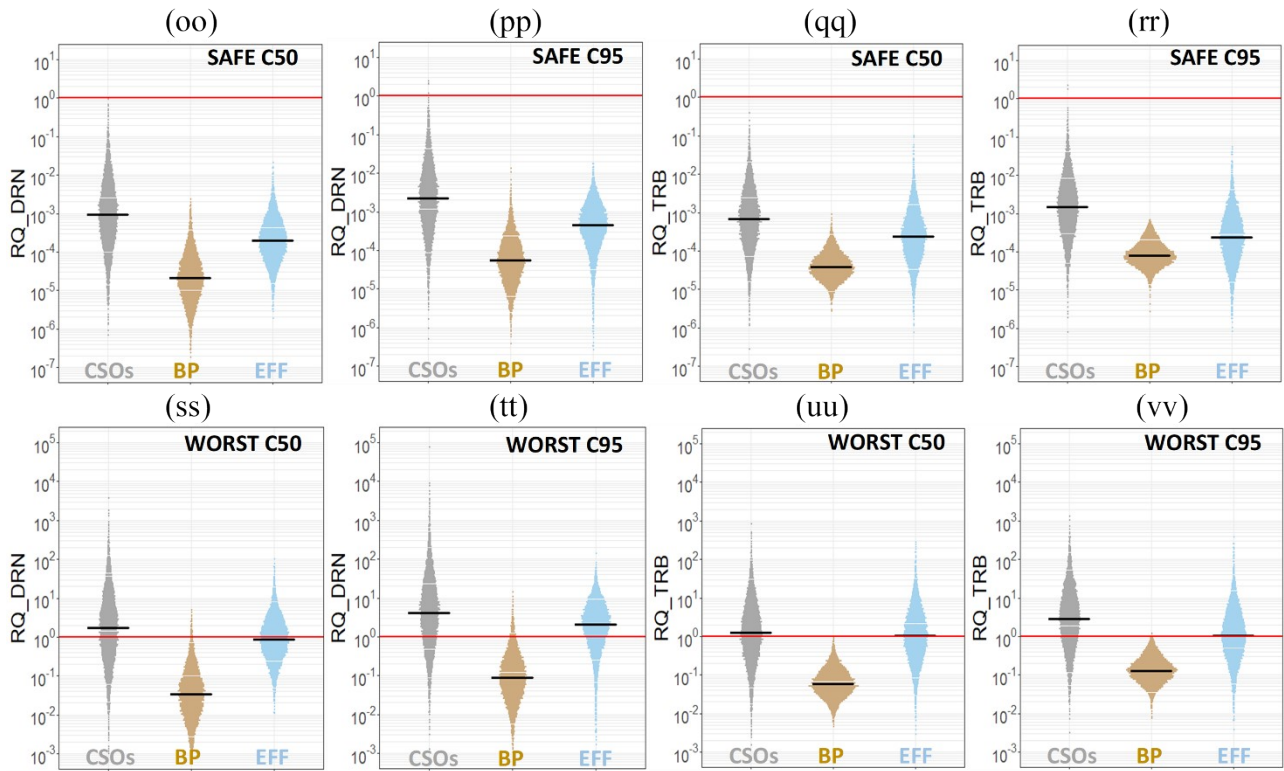

45  
46 **Figure S3.** RQ values for each micropollutant (C50 and C95 scenarios) for each discharge in Safe and Worst  
47 scenarios.

48

| SCENARIOS |     | $n_{RQ_{i,j}>1}$ |    |     | SCENARIOS |        | $n_{RQ_{i,j}>1}$ |      |     | SCENARIOS |   | $n_{RQ_{i,j}>1}$ |     |      |    |   |    |
|-----------|-----|------------------|----|-----|-----------|--------|------------------|------|-----|-----------|---|------------------|-----|------|----|---|----|
|           |     | CSOs             | BP | EFF |           |        | CSOs             | BP   | EFF |           |   | CSOs             | BP  | EFF  |    |   |    |
| DF        | CP  | RQP              |    |     |           | DF     | CP               | RQP  |     |           |   | DF               | CP  | RQP  |    |   |    |
| SAFE      | C50 | RQ50             | 0  | 0   | 0         | MEDIUM | C50              | RQ50 | 1   | 0         | 0 | WORST            | C50 | RQ50 | 9  | 3 | 8  |
|           |     | RQ75             | 0  | 0   | 0         |        |                  | RQ75 | 2   | 0         | 1 |                  |     | RQ75 | 12 | 4 | 12 |
|           |     | RQ95             | 1  | 0   | 0         |        |                  | RQ95 | 4   | 1         | 3 |                  |     | RQ95 | 12 | 7 | 12 |
|           | C75 | RQ50             | 0  | 0   | 0         |        | C75              | RQ50 | 1   | 0         | 0 |                  | C75 | RQ50 | 11 | 3 | 10 |
|           |     | RQ75             | 0  | 0   | 0         |        |                  | RQ75 | 2   | 1         | 1 |                  |     | RQ75 | 12 | 6 | 12 |
|           |     | RQ95             | 1  | 0   | 0         |        |                  | RQ95 | 7   | 1         | 4 |                  |     | RQ95 | 12 | 7 | 12 |
|           | C95 | RQ50             | 0  | 0   | 0         |        | C95              | RQ50 | 2   | 1         | 0 |                  | C95 | RQ50 | 11 | 6 | 11 |
|           |     | RQ75             | 1  | 0   | 0         |        |                  | RQ75 | 4   | 1         | 2 |                  |     | RQ75 | 12 | 6 | 12 |
|           |     | RQ95             | 1  | 0   | 0         |        |                  | RQ95 | 9   | 1         | 4 |                  |     | RQ95 | 12 | 8 | 12 |

49  
50 **Figure S4.** Number of pollutants exceeding the threshold  $RQ_{i,j}=1$  per each discharge type and per each  
51 scenario.  
52



53 **Table S7.** P-value of the Mann-Whitney tests performed to compare the RQ values obtained with different  
 54 combinations of CP and RQP. Results refer to the Worst scenario. The p-values below 0.1 are reported in  
 55 red, the p-values below 0.05 are reported in bold red.

| WORST SCENARIO |      | C50          |              |              | C75          |              |              | C95          |              |              |
|----------------|------|--------------|--------------|--------------|--------------|--------------|--------------|--------------|--------------|--------------|
|                |      | RQ50         | RQ75         | RQ95         | RQ50         | RQ75         | RQ95         | RQ50         | RQ75         | RQ95         |
| <b>CSOs</b>    |      |              |              |              |              |              |              |              |              |              |
| C50            | RQ50 | -            | 0.141        | <b>0.004</b> | 0.436        | -            | -            | 0.126        | -            | -            |
|                | RQ75 | 0.141        | -            | <b>0.035</b> | -            | 0.47         | -            | -            | 0.112        | -            |
|                | RQ95 | <b>0.004</b> | <b>0.035</b> | -            | -            | -            | 0.47         | -            | -            | <b>0.023</b> |
| C75            | RQ50 | 0.436        | -            | -            | -            | 0.112        | <b>0.003</b> | 0.312        | -            | -            |
|                | RQ75 | -            | 0.47         | -            | 0.112        | -            | <b>0.035</b> | -            | 0.371        | -            |
|                | RQ95 | -            | -            | 0.47         | <b>0.003</b> | <b>0.035</b> | -            | -            | -            | 0.312        |
| C95            | RQ50 | 0.126        | -            | -            | 0.312        | -            | -            | -            | 0.100        | <b>0.003</b> |
|                | RQ75 | -            | 0.112        | -            | -            | 0.371        | -            | 0.100        | -            | <b>0.026</b> |
|                | RQ95 | -            | -            | <b>0.023</b> | -            | -            | 0.312        | <b>0.003</b> | <b>0.026</b> | -            |
| <b>BP</b>      |      |              |              |              |              |              |              |              |              |              |
| C50            | RQ50 | -            | 0.453        | <b>0.100</b> | 0.624        | -            | -            | 0.237        | -            | -            |
|                | RQ75 | 0.453        | -            | 0.248        | -            | 0.544        | -            | -            | 0.157        | -            |
|                | RQ95 | <b>0.100</b> | 0.248        | -            | -            | -            | 0.507        | -            | -            | 0.141        |
| C75            | RQ50 | 0.624        | -            | -            | -            | <b>0.083</b> | <b>0.083</b> | 0.371        | -            | -            |
|                | RQ75 | -            | 0.544        | -            | <b>0.083</b> | -            | 0.248        | -            | 0.436        | -            |
|                | RQ95 | -            | -            | 0.507        | <b>0.083</b> | 0.248        | -            | -            | -            | 0.341        |
| C95            | RQ50 | 0.237        | -            | -            | 0.371        | -            | -            | -            | 0.453        | <b>0.073</b> |
|                | RQ75 | -            | 0.157        | -            | -            | 0.436        | -            | 0.453        | -            | 0.225        |
|                | RQ95 | -            | -            | 0.141        | -            | -            | 0.341        | <b>0.073</b> | 0.225        | -            |
| <b>EFF</b>     |      |              |              |              |              |              |              |              |              |              |
| C50            | RQ50 | -            | 0.126        | <b>0.009</b> | 0.403        | -            | -            | 0.214        | -            | -            |
|                | RQ75 | 0.126        | -            | <b>0.04</b>  | -            | 0.371        | -            | -            | 0.126        | -            |
|                | RQ95 | <b>0.009</b> | <b>0.040</b> | -            | -            | -            | 0.312        | -            | -            | <b>0.046</b> |
| C75            | RQ50 | 0.403        | -            | -            | -            | <b>0.089</b> | <b>0.009</b> | 0.403        | -            | -            |
|                | RQ75 | -            | 0.371        | -            | <b>0.089</b> | -            | <b>0.030</b> | -            | 0.312        | -            |
|                | RQ95 | -            | -            | 0.312        | <b>0.009</b> | <b>0.03</b>  | -            | -            | -            | 0.157        |
| C95            | RQ50 | 0.214        | -            | -            | 0.403        | -            | -            | -            | 0.078        | <b>0.002</b> |
|                | RQ75 | -            | 0.126        | -            | -            | 0.312        | -            | 0.078        | -            | <b>0.035</b> |
|                | RQ95 | -            | -            | <b>0.046</b> | -            | -            | 0.157        | <b>0.002</b> | <b>0.035</b> | -            |

56

57

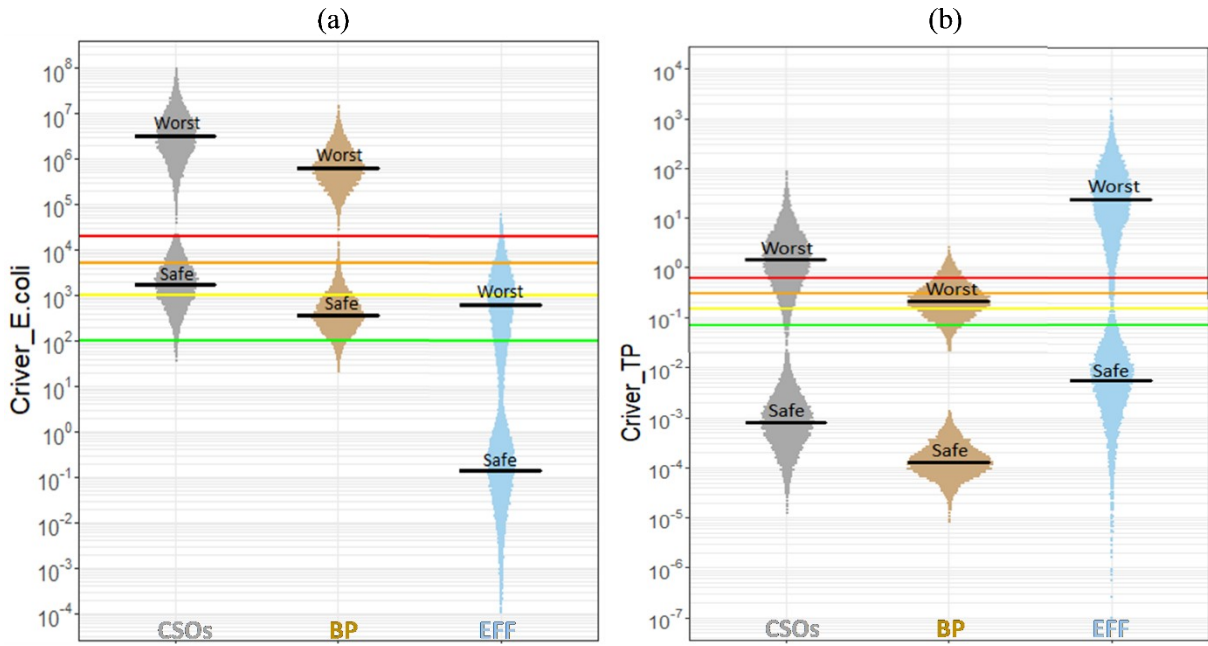

58  
 59 **Figure S5.** Concentration in the river in Safe and Worst scenario using C75 for *E. coli* (a) and TP (b). The 5  
 60 quality level classes are enclosed in the graphs between lines with different colors, where green line  
 61 represent the threshold between class 1 and 2.  
 62

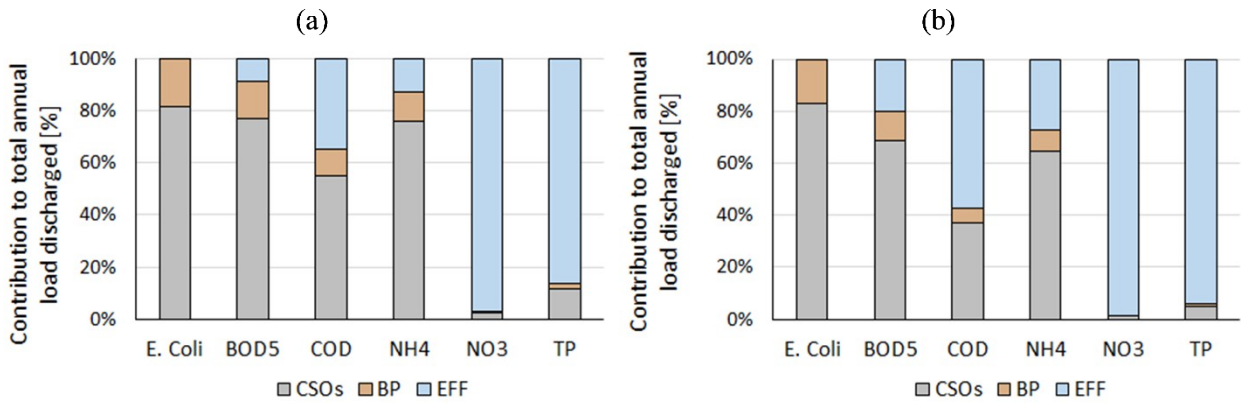

63  
 64 **Figure S6.** (b) Apportionment of the total annual load discharged to the river in (a) Safe and (b) Worst  
 65 scenario.  
 66  
 67

## 68 REFERENCES

- 69 1 J. P. Nickel, F. Sacher and S. Fuchs, Up-to-date monitoring data of wastewater and stormwater  
70 quality in Germany, *Water Res.*, 2021, **202**, 117452.
- 71 2 A. Brzezińska, G. Sakson and M. Zawilski, Predictive model of pollutant Loads discharged by  
72 combined sewer overflows, *Water Sci. Technol.*, 2018, **77**, 1819–1828.
- 73 3 A. Montserrat, T. Hofer, M. Poch, D. Muschalla and L. Corominas, Using the duration of combined  
74 sewer overflow events for the calibration of sewer hydrodynamic models, *Urban Water J.*, 2017, **14**,  
75 782–788.
- 76 4 W. Tao, J. S. Bays, D. Meyer, R. C. Smardon and Z. F. Levy, Constructed wetlands for treatment of  
77 combined sewer overflow in the US: A review of design challenges and application status, *Water*  
78 *(Switzerland)*, 2014, **6**, 3362–3385.
- 79 5 K. Seggelke, R. Löwe, T. Beeneken and L. Fuchs, Implementation of an integrated real-time control  
80 system of sewer system and waste water treatment plant in the city of Wilhelmshaven, *Urban Water*  
81 *J.*, 2013, **10**, 330–341.
- 82 6 M. Al Aukidy and P. Verlicchi, Contributions of combined sewer overflows and treated effluents to  
83 the bacterial load released into a coastal area, *Sci. Total Environ.*, 2017, **607–608**, 483–496.
- 84 7 E. Gooré Bi, F. Monette and J. Gasperi, Analysis of the influence of rainfall variables on urban  
85 effluents concentrations and fluxes in wet weather, *J. Hydrol.*, 2015, **523**, 320–332.
- 86 8 J. Gasperi, S. Zgheib, M. Cladière, V. Rocher, R. Moilleron and G. Chebbo, Priority pollutants in  
87 urban stormwater: Part 2 - Case of combined sewers, *Water Res.*, 2012, **46**, 6693–6703.
- 88 9 G. Gruber, S. Winkler and A. Pressl, Continuous monitoring in sewer networks an approach for  
89 quantification of pollution loads from CSOs into surface water bodies, *Water Sci. Technol.*, 2005, **52**,  
90 215–223.
- 91 10 C. Paijens, A. Bressy, B. Frère, D. Tedoldi, R. Mailler, V. Rocher, P. Neveu and R. Moilleron, Urban  
92 pathways of biocides towards surface waters during dry and wet weathers: Assessment at the Paris  
93 conurbation scale, *J. Hazard. Mater.*, 2021, **402**, 123765.
- 94 11 L. Barone, M. Pilotti, G. Valerio, M. Balistrocchi, L. Milanese, S. C. Chapra and D. Nizzoli, Analysis  
95 of the residual nutrient load from a combined sewer system in a watershed of a deep Italian lake, *J.*  
96 *Hydrol.*, 2019, **571**, 202–213.
- 97 12 F. Masi, A. Rizzo, R. Bresciani and G. Conte, Constructed wetlands for combined sewer overflow  
98 treatment: Ecosystem services at Gorla Maggiore, Italy, *Ecol. Eng.*, 2017, **98**, 427–438.
- 99 13 C. Ferrario, C. Peruzzi, A. Galli, M. Evangelisti, S. Lavrnjic and D. Masseroni, 2022, pp. 2021–2023.
- 100 14 M. Schütze, M. Lange, M. Pabst and U. Haas, Astlingen – A benchmark for real time control (RTC),  
101 *Water Sci. Technol.*, 2017, **2017**, 552–560.
- 102 15 P. van Daal, G. Gruber, J. Langeveld, D. Muschalla and F. Clemens, Performance evaluation of real  
103 time control in urban wastewater systems in practice: Review and perspective, *Environ. Model.*  
104 *Softw.*, 2017, **95**, 90–101.
- 105 16 G. Sakson, M. Zawilski and A. Brzezińska, Analysis of combined sewer flow storage scenarios prior  
106 to wastewater treatment plant, *Ecol. Chem. Eng. S*, 2018, **25**, 619–630.
- 107 17 K. Tondera, S. Koenen and J. Pinnekamp, Survey monitoring results on the reduction of  
108 micropollutants, bacteria, bacteriophages and TSS in retention soil filters, *Water Sci. Technol.*, 2013,  
109 **68**, 1004–1012.
- 110 18 K. Tondera, J. P. Ruppelt, J. Pinnekamp, T. Kistemann and C. Schreiber, Reduction of  
111 micropollutants and bacteria in a constructed wetland for combined sewer overflow treatment after 7  
112 and 10 years of operation, *Sci. Total Environ.*, 2019, **651**, 917–927.

- 113 19 T. G. Pálffy, M. Gerodolle, R. Gourdon, D. Meyer, S. Troesch and P. Molle, Performance assessment  
114 of a vertical flow constructed wetland treating unsettled combined sewer overflow, *Water Sci.*  
115 *Technol.*, 2017, **75**, 2586–2597.
- 116 20 M. A. Launay, U. Dittmer and H. Steinmetz, Organic micropollutants discharged by combined sewer  
117 overflows – Characterisation of pollutant sources and stormwater-related processes, *Water Res.*,  
118 2016, **104**, 82–92.
- 119 21 P. J. Phillips, A. T. Chalmers, J. L. Gray, D. W. Kolpin, W. T. Foreman and G. R. Wall, Combined  
120 sewer overflows: An environmental source of hormones and wastewater micropollutants, *Environ.*  
121 *Sci. Technol.*, 2012, **46**, 5336–5343.
- 122 22 T. F. Diaz-Fierros, J. Puerta, J. Suarez and V. F. Diaz-Fierros, Contaminant loads of CSOs at the  
123 wastewater treatment plant of a city in NW Spain, *Urban Water*, 2002, **4**, 291–299.
- 124 23 J. Suárez and J. Puertas, Determination of COD, BOD, and suspended solids loads during combined  
125 sewer overflow (CSO) events in some combined catchments in Spain, *Ecol. Eng.*, 2005, **24**, 199–217.
- 126 24 J. P. Nickel and S. Fuchs, Large-Volume Samplers for Efficient Composite Sampling and Particle  
127 Characterization in Sewer Systems, *Water*, 2021, **13**, 2831.
- 128 25 A. Foglia, C. Andreola, G. Cipolletta, S. Radini, Ç. Akyol, A. L. Eusebi, P. Stanchev, E. Katsou and  
129 F. Fatone, Comparative life cycle environmental and economic assessment of anaerobic membrane  
130 bioreactor and disinfection for reclaimed water reuse in agricultural irrigation: A case study in Italy,  
131 *J. Clean. Prod.*, , DOI:10.1016/j.jclepro.2021.126201.
- 132 26 A. Turolla, M. Cattaneo, F. Marazzi, V. Mezzanotte and M. Antonelli, Antibiotic resistant bacteria in  
133 urban sewage: Role of full-scale wastewater treatment plants on environmental spreading,  
134 *Chemosphere*, 2018, **191**, 761–769.
- 135 27 O. Golovko, S. Örn, M. Söregård, K. Frieberg, W. Nassazzi, F. Y. Lai and L. Ahrens, Occurrence  
136 and removal of chemicals of emerging concern in wastewater treatment plants and their impact on  
137 receiving water systems, *Sci. Total Environ.*, 2021, **754**, 142122.
- 138 28 M. Česen, M. Ahel, S. Terzić, D. J. Heath and E. Heath, The occurrence of contaminants of emerging  
139 concern in Slovenian and Croatian wastewaters and receiving Sava river, *Sci. Total Environ.*, 2019,  
140 **650**, 2446–2453.
- 141 29 P. Paíga, M. Correia, M. J. Fernandes, A. Silva, M. Carvalho, J. Vieira, S. Jorge, J. G. Silva, C. Freire  
142 and C. Delerue-Matos, Assessment of 83 pharmaceuticals in WWTP influent and effluent samples by  
143 UHPLC-MS/MS: Hourly variation, *Sci. Total Environ.*, 2019, **648**, 582–600.
- 144 30 K. KołECKA, M. Gajewska, P. Stepnowski and M. Caban, Spatial distribution of pharmaceuticals in  
145 conventional wastewater treatment plant with Sludge Treatment Reed Beds technology, *Sci. Total*  
146 *Environ.*, 2019, **647**, 149–157.
- 147 31 B. Díaz-Garduño, M. G. Pintado-Herrera, M. Biel-Maeso, J. J. Rueda-Márquez, P. A. Lara-Martín, J.  
148 A. Perales, M. A. Manzano, C. Garrido-Pérez and M. L. Martín-Díaz, Environmental risk assessment  
149 of effluents as a whole emerging contaminant: Efficiency of alternative tertiary treatments for  
150 wastewater depuration, *Water Res.*, 2017, **119**, 136–149.
- 151 32 I. Aymerich, V. Acuña, D. Barceló, M. J. García, M. Petrovic, M. Poch, S. Rodríguez-Mozaz, I.  
152 Rodríguez-Roda, S. Sabater, D. von Schiller and L. Corominas, Attenuation of pharmaceuticals and  
153 their transformation products in a wastewater treatment plant and its receiving river ecosystem, *Water*  
154 *Res.*, 2016, **100**, 126–136.
- 155 33 A. Ghirardini, O. Zoboli, M. Zessner and P. Verlicchi, Most relevant sources and emission pathways  
156 of pollution for selected pharmaceuticals in a catchment area based on substance flow analysis, *Sci.*  
157 *Total Environ.*, 2021, **751**, 142328.
- 158 34 S. Even, J. M. Mouchel, P. Servais, N. Flipo, M. Poulin, S. Blanc, M. Chabanel and C. Paffoni,

- 159 Modelling the impacts of Combined Sewer Overflows on the river Seine water quality, *Sci. Total*  
160 *Environ.*, 2007, **375**, 140–151.
- 161 35 L. B. Massey, B. E. Haggard, J. M. Galloway, K. A. Loftin, M. T. Meyer and W. R. Green, Antibiotic  
162 fate and transport in three effluent-dominated Ozark streams, *Ecol. Eng.*, 2010, **36**, 930–938.
- 163 36 U. Somorowska and M. Łaszewski, Human-influenced streamflow during extreme drought:  
164 identifying driving forces, modifiers, and impacts in an urbanized catchment in central Poland, *Water*  
165 *Environ. J.*, 2017, **31**, 345–352.
- 166 37 A. Casadio, M. Maglionico, A. Bolognesi and S. Artina, Toxicity and pollutant impact analysis in an  
167 urban river due to combined sewer overflows loads, *Water Sci. Technol.*, 2010, **61**, 207–215.
- 168 38 M. Gros, M. Petrović and D. Barceló, Wastewater treatment plants as a pathway for aquatic  
169 contamination by pharmaceuticals in the ebro river basin (northeast Spain), *Environ. Toxicol. Chem.*,  
170 2007, **26**, 1553–1562.
- 171 39 I. M. Schreiber and W. A. Mitch, Occurrence and fate of nitrosamines and nitrosamine precursors in  
172 wastewater-impacted surface waters using boron as a conservative tracer, *Environ. Sci. Technol.*,  
173 2006, **40**, 3203–3210.
- 174 40 B. Purcell, Z. A. Barkjohn, J. R. Kasprzyk and A. S. Stillwell, Linking Reclaimed Water  
175 Consumption with Quantitative Downstream Flow Impacts, *J. Water Resour. Plan. Manag.*, 2021,  
176 **147**, 04021021.
- 177 41 L. Solagaistua, I. de Guzmán, M. Barrado, L. Mijangos, N. Etxebarria, G. García-Baquero, A.  
178 Larrañaga, D. von Schiller and A. Elosegi, Testing wastewater treatment plant effluent effects on  
179 microbial and detritivore performance: A combined field and laboratory experiment, *Aquat. Toxicol.*,  
180 2018, **203**, 159–171.
- 181 42 E. J. Meneses, M. Gaussens, C. Jakobsen, P. S. Mikkelsen, M. Grum and L. Vezzaro, Coordinating  
182 rule-based and system-wide model predictive control strategies to reduce storage expansion of  
183 combined urban drainage systems: The case study of Lundtofte, Denmark, *Water (Switzerland)*, ,  
184 DOI:10.3390/w10010076.
- 185 43 N. Lopez-Herguedas, B. González-Gaya, N. Castelblanco-Boyacá, A. Rico, N. Etxebarria, M.  
186 Olivares, A. Prieto and O. Zuloaga, Characterization of the contamination fingerprint of wastewater  
187 treatment plant effluents in the Henares River Basin (central Spain) based on target and suspect  
188 screening analysis, *Sci. Total Environ.*, , DOI:10.1016/j.scitotenv.2021.151262.
- 189 44 O. Matviichuk, L. Mondamert, C. Geffroy, M. Gaschet, C. Dagot and J. Labanowski, River Biofilms  
190 Microbiome and Resistome Responses to Wastewater Treatment Plant Effluents Containing  
191 Antibiotics, *Front. Microbiol.*, 2022, **13**, 1–14.
- 192 45 P. Kay, S. R. Hughes, J. R. Ault, A. E. Ashcroft and L. E. Brown, Widespread, routine occurrence of  
193 pharmaceuticals in sewage effluent, combined sewer overflows and receiving waters, *Environ.*  
194 *Pollut.*, 2017, **220**, 1447–1455.
- 195 46 S. Castiglioni, S. Valsecchi, S. Polesello, M. Rusconi, M. Melis, M. Palmiotto, A. Manenti, E. Davoli  
196 and E. Zuccato, Sources and fate of perfluorinated compounds in the aqueous environment and in  
197 drinking water of a highly urbanized and industrialized area in Italy, *J. Hazard. Mater.*, 2015, **282**,  
198 51–60.
- 199 47 D. Ramírez-Morales, M. Masis-Mora, J. R. Montiel-Mora, J. C. Cambronero-Heinrichs, S. Briceño-  
200 Guevara, C. E. Rojas-Sánchez, M. Méndez-Rivera, V. Arias-Mora, R. Tormo-Budowski, L. Brenes-  
201 Alfaro and C. E. Rodríguez-Rodríguez, Occurrence of pharmaceuticals, hazard assessment and  
202 ecotoxicological evaluation of wastewater treatment plants in Costa Rica, *Sci. Total Environ.*, 2020,  
203 **746**, 141200.
- 204 48 R. C. Pivetta, C. Rodrigues-Silva, A. R. Ribeiro and S. Rath, Tracking the occurrence of psychotropic  
205 pharmaceuticals in Brazilian wastewater treatment plants and surface water, with assessment of

- 206 environmental risks, *Sci. Total Environ.*, 2020, **727**, 138661.
- 207 49 A. C. Kondor, É. Molnár, G. Jakab, A. Vancsik, T. Filep, J. Szeberényi, L. Szabó, G. Maász, Z.  
208 Pirger, A. Weiperth, Á. Ferincz, Á. Staszny, P. Dobosy, K. Horváthné Kiss, I. G. Hatvani and Z.  
209 Szalai, Pharmaceuticals in water and sediment of small streams under the pressure of urbanization:  
210 Concentrations, interactions, and risks, *Sci. Total Environ.*, , DOI:10.1016/j.scitotenv.2021.152160.
- 211 50 P. Phillips and A. Chalmers, Wastewater effluent, combined sewer overflows, and other sources of  
212 organic compounds to Lake Champlain, *J. Am. Water Resour. Assoc.*, 2009, **45**, 45–57.
- 213 51 J. Ryu, J. Oh, S. A. Snyder and Y. Yoon, Determination of micropollutants in combined sewer  
214 overflows and their removal in a wastewater treatment plant (Seoul, South Korea), *Environ. Monit.*  
215 *Assess.*, 2014, **186**, 3239–3251.
- 216 52 B. Kasprzyk-Hordern, R. M. Dinsdale and A. J. Guwy, The removal of pharmaceuticals, personal  
217 care products, endocrine disruptors and illicit drugs during wastewater treatment and its impact on the  
218 quality of receiving waters, *Water Res.*, 2009, **43**, 363–380.
- 219 53 J. Ryu, Y. Yoon and J. Oh, Occurrence of endocrine disrupting compounds and pharmaceuticals in 11  
220 WWTPs in Seoul, Korea, *KSCE J. Civ. Eng.*, 2011, **15**, 57–64.
- 221 54 T. Reemtsma, U. Miehe, U. Duennbier and M. Jekel, Polar pollutants in municipal wastewater and  
222 the water cycle: Occurrence and removal of benzotriazoles, *Water Res.*, 2010, **44**, 596–604.
- 223 55 S. Dogruel, Z. Cetinkaya Atesci, E. Aydin and E. Pehlivanoglu-Mantas, Ozonation in advanced  
224 treatment of secondary municipal wastewater effluents for the removal of micropollutants, *Environ.*  
225 *Sci. Pollut. Res.*, 2020, **27**, 45460–45475.
- 226 56 M. A. Álvarez-Vázquez, R. Prego, N. Ospina-Alvarez, M. Caetano, P. Bernárdez, M. Doval, A. V.  
227 Filgueiras and C. Vale, Anthropogenic changes in the fluxes to estuaries: Wastewater discharges  
228 compared with river loads in small rias, *Estuar. Coast. Shelf Sci.*, 2016, **179**, 112–123.
- 229 57 P. Weyrauch, A. Matzinger, E. Pawlowsky-Reusing, S. Plume, D. von Seggern, B. Heinzmann, K.  
230 Schroeder and P. Rouault, Contribution of combined sewer overflows to trace contaminant loads in  
231 urban streams, *Water Res.*, 2010, **44**, 4451–4462.
- 232 58 U. Dittmer, A. Bachmann-Machnik and M. A. Launay, Impact of Combined Sewer Systems on the  
233 Quality of Urban Streams: Frequency and Duration of Elevated Micropollutant Concentrations,  
234 *Water*, 2020, **12**, 850.
- 235 59 A. Mas-Ponce, R. Molowny-Horas, E. Pla and S. Sánchez-Mateo, Assessing the Effects of  
236 Wastewater Treatment Plant Effluents on the Ecological Quality Status in a Mediterranean River  
237 Basin, *Environ. Process.*, 2021, **8**, 533–551.
- 238 60 M. Taghipour, S. Tolouei, L. Autixier, M. Prévost, A. Shakibaeinia and S. Dorner, Normalized  
239 dynamic behavior of combined sewer overflow discharges for source water characterization and  
240 management, *J. Environ. Manage.*, 2019, **249**, 109386.
- 241 61 P. Crocetti, A. L. Eusebi, C. Bruni, E. Marinelli, G. Darvini, C. B. Carini, C. Bollettini, V. Recanati,  
242 Ç. Akyol and F. Fatone, Catchment-wide validated assessment of combined sewer overflows (CSOs)  
243 in a mediterranean coastal area and possible disinfection methods to mitigate microbial  
244 contamination, *Environ. Res.*, 2021, **196**, 110367.
- 245 62 K. Tondera, K. Klaer, J. Gebhardt, J. Wingender, C. Koch, M. Horstkott, M. Strathmann, L. Jurzik, I.  
246 A. Hamza and J. Pinnekamp, Reducing pathogens in combined sewer overflows using ozonation or  
247 UV irradiation, *Int. J. Hyg. Environ. Health*, 2015, **218**, 731–741.
- 248 63 M. Kafi, J. Gasperi, R. Moilleron, M. C. Gromaire and G. Chebbo, Spatial variability of the  
249 characteristics of combined wet weather pollutant loads in Paris, *Water Res.*, 2008, **42**, 539–549.
- 250 64 E. Gooré Bi, F. Monette, J. Gasperi and Y. Perrodin, Assessment of the ecotoxicological risk of  
251 combined sewer overflows for an aquatic system using a coupled “substance and bioassay” approach,

- 252 *Environ. Sci. Pollut. Res.*, 2015, **22**, 4460–4474.
- 253 65 S. Sandoval, A. Torres, E. Pawlowsky-Reusing, M. Riechel and N. Caradot, The evaluation of  
254 rainfall influence on combined sewer overflows characteristics: The Berlin case study, *Water Sci.*  
255 *Technol.*, 2013, **68**, 2683–2690.
- 256 66 J. Gasperi, S. Garnaud, V. Rocher and R. Moilleron, Priority pollutants in wastewater and combined  
257 sewer overflow, *Sci. Total Environ.*, 2008, **407**, 263–272.
- 258 67 J. G. Li, H. Horneck, D. Averill, J. A. McCorquodale and N. Biswas, High-rate retention treatment  
259 basins for CSO control in Windsor, Ontario, *Water Qual. Res. J. Canada*, 2004, **39**, 449–456.
- 260 68 H. Birch, P. S. Mikkelsen, J. K. Jensen and H. C. Holten Lützhøft, Micropollutants in stormwater  
261 runoff and combined sewer overflow in the Copenhagen area, Denmark, *Water Sci. Technol.*, 2011,  
262 **64**, 485–493.
- 263 69 L. Mutzner, C. Bohren, S. Mangold, S. Bloem and C. Ort, Spatial Differences among Micropollutants  
264 in Sewer Overflows: A Multisite Analysis Using Passive Samplers, *Environ. Sci. Technol.*, 2020, **54**,  
265 6584–6593.
- 266 70 C. Afonso-Olivares, Z. Sosa-Ferrera and J. J. Santana-Rodríguez, Occurrence and environmental  
267 impact of pharmaceutical residues from conventional and natural wastewater treatment plants in Gran  
268 Canaria (Spain), *Sci. Total Environ.*, 2017, **599–600**, 934–943.
- 269 71 M. C. Campos-Mañas, P. Plaza-Bolaños, J. A. Sánchez-Pérez, S. Malato and A. Agüera, Fast  
270 determination of pesticides and other contaminants of emerging concern in treated wastewater using  
271 direct injection coupled to highly sensitive ultra-high performance liquid chromatography-tandem  
272 mass spectrometry, *J. Chromatogr. A*, 2017, **1507**, 84–94.
- 273 72 European Commission, 2013. Directive 2013/39/EU of the European Parliament and of the Council  
274 of 12 August 2013 amending Directives 2000/60/EC and 2008/ 105/EC as regards priority substances  
275 in the field of water policy. Off. J. Eur. Union L 226..
- 276
